# Supplementary material for: Human Lymph Node Stromal Cells Have the Machinery to Regulate Peripheral Tolerance during Health and Rheumatoid Arthritis
Source: PubMed Central journal article supplement (PMC7460812; doi:10.3390/ijms21165713), 2020-08-09
Supplement: ijms-21-05713-s001.pdf [file ijms-21-05713-s001.pdf]

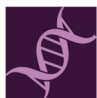

Supplementary Materials:

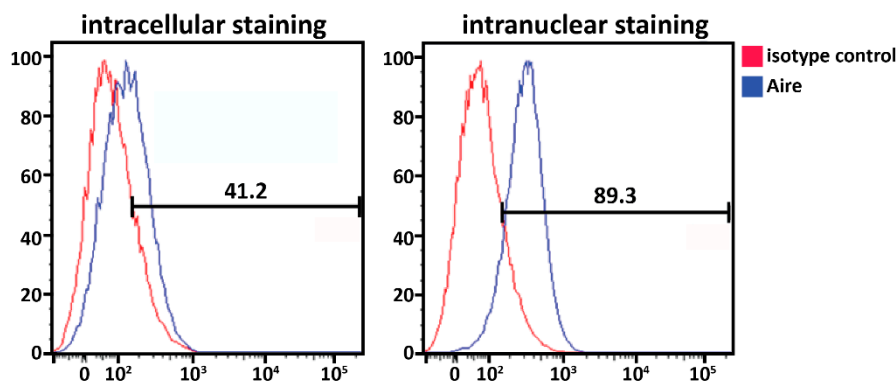

**Figure S1.** Intranuclear staining of Aire protein in cultured human LNSCs. Aire protein expression was measured by flow cytometry comparing intracellular versus intranuclear staining (tested on 2 healthy donors passage 3). Histogram presents % of positive cells in comparison to isotype staining.

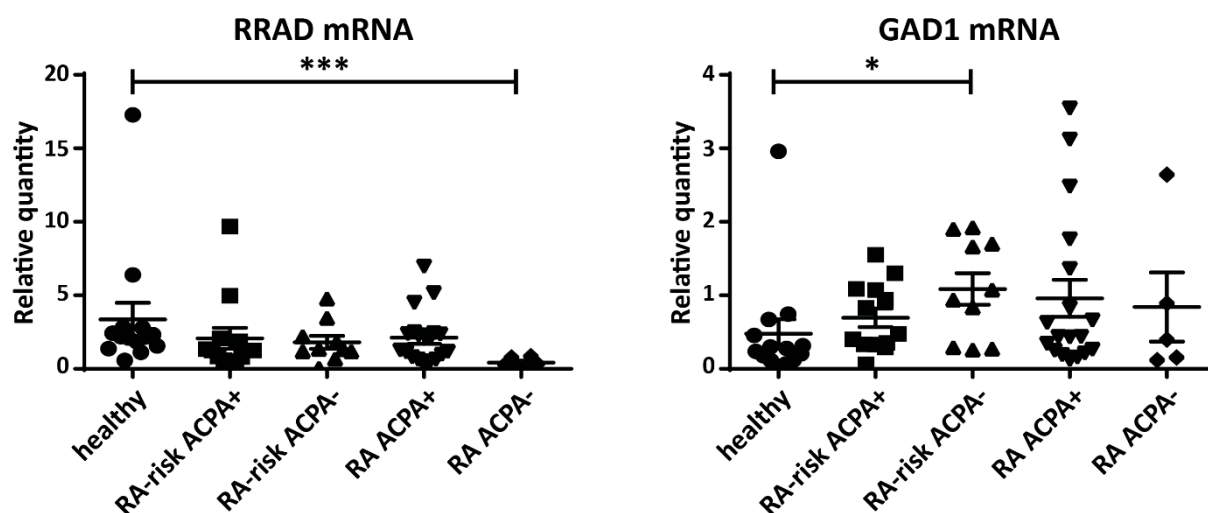

**Figure S2.** Expression of RRAD and GAD1 stratified according to ACPA status. Expression of RRAD and GAD1 was assessed by qPCR in LNSCs of passage 2 derived from different donor groups (healthy individuals  $n = 14$ , RA-risk ACPA+ individuals  $n = 13$ , RA-risk ACPA- individuals  $n = 10$ , RA ACPA+ patients  $n = 18$  and RA ACPA- patients  $n = 6$ ). Relative quantity is displayed as median and interquartile range. Differences between donor groups were assessed by Kruskal-Wallis followed by a post Dunn's test. \* $p < 0.050$ , \*\* $p < 0.010$ , \*\*\* $p < 0.001$ .

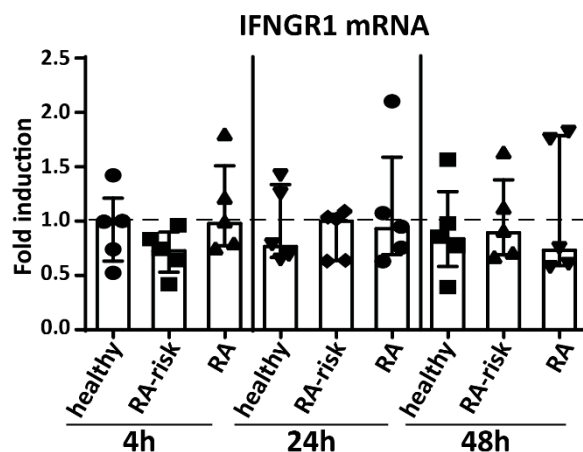

**Figure S3.** Induction of IFNGR1 after stimulation with IFN $\gamma$  in human LNSCs. Expression of IFN $\gamma$ R1 was assessed by qPCR in LNSCs after stimulation with IFN $\gamma$  for 4 h, 24 h or 48 h. Data are represented as fold induction (median with interquartile range) by comparing the protein levels in stimulated cells to corresponding unstimulated cells in 15 donors ( $n = 5$  per donor group). Dotted line represents a fold induction value of 1.

**Table S1.** Primers used in this study.

| Gene symbol | Taqman Assay ID               |                               |
|-------------|-------------------------------|-------------------------------|
| DEAF1       | Hs00221402_m1                 |                               |
| AIRE        | Hs00230829_m1                 |                               |
| HLA-DR      | Hs00219575_m1                 |                               |
| CD80        | Hs00175478_m1                 |                               |
| CD86        | Hs01567026_m1                 |                               |
| IL-10       | Hs00961622_m1                 |                               |
| CD274       | Hs01125301_m1                 |                               |
| NOS2        | Hs01075529_m1                 |                               |
| 18S         | Hs99999901_s1                 |                               |
| Gene symbol | Forward primer sequence 5'-3' | Reverse primer sequence 5'-3' |
| RRAD        | GCAGCAGGGCACACCTATGA          | CCGTCCTGCTCCCAAATGTC          |
| GAD1        | CCCACAACGTACGATACCTG          | CACAAGGCGACTCTTCTCTT          |
| PLP1        | TCAATGTGATCCATGCCTTCCA        | GGTGGTCTTGTAGTCGCCAA          |
| AFP         | CGAACTTTCCAAGCCATAACTG        | CTCCTGGTATCCTTTAGCAACT        |
| IFNGR1      | CATCACGTCATAACCAGCCATTT       | CTGGATTGTCTTCGGTATGCAT        |
| CD40        | CACCTCGCTATGGTTCGTCT          | GGCACAAAGAACAGCACTGA          |
| TGFB1       | TGACCTGGCCACCATTCAT           | TCCGTGGAGCTGAAGCAATAG         |
| IDO         | TTGCTAAAGGCGCTGTTGGA          | TGCCTTTCCAGCCAGACAAAT         |
| 18S         | CCGAGTAAGTGCGGGTCATAA         | CCATCCAATCGGTAGTAGCG          |
